# Supplementary material for: Solution processable Si/Ge heterostructure NWs enabling anode mass reduction for practical full-cell Li-ion batteries
Source: Royal Society of Chemistry journal article supplement (doi:10.1039/d3na00648d), 2023-01-01
Supplement: d3na00648d1.pdf [file d3na00648d1.pdf]

# **Solution Processable Si/Ge Heterostructure NWs Enabling Anode Mass Reduction for Practical Full-cell Li-ion Batteries**

Temilade Esther Adegoke <sup>§a</sup>, Syed Abdul Ahad <sup>§a</sup>, Ursel Bangert <sup>b</sup>, Hugh Geaney <sup>\*a</sup>, Kevin M. Ryan <sup>\*a</sup>

*<sup>a</sup>Department of Chemical Sciences and Bernal Institute, University of Limerick, Limerick, V94 T9PX Ireland.*

*E-mail:* kevin.m.ryan@ul.ie, hugh.geaney@ul.ie

*<sup>b</sup>Department of Physics and Bernal Institute, University of Limerick, Limerick, V94 T9PX Ireland.*

<sup>§</sup> These authors contributed equally to the work

**SUPPLEMENTARY MATERIALS**

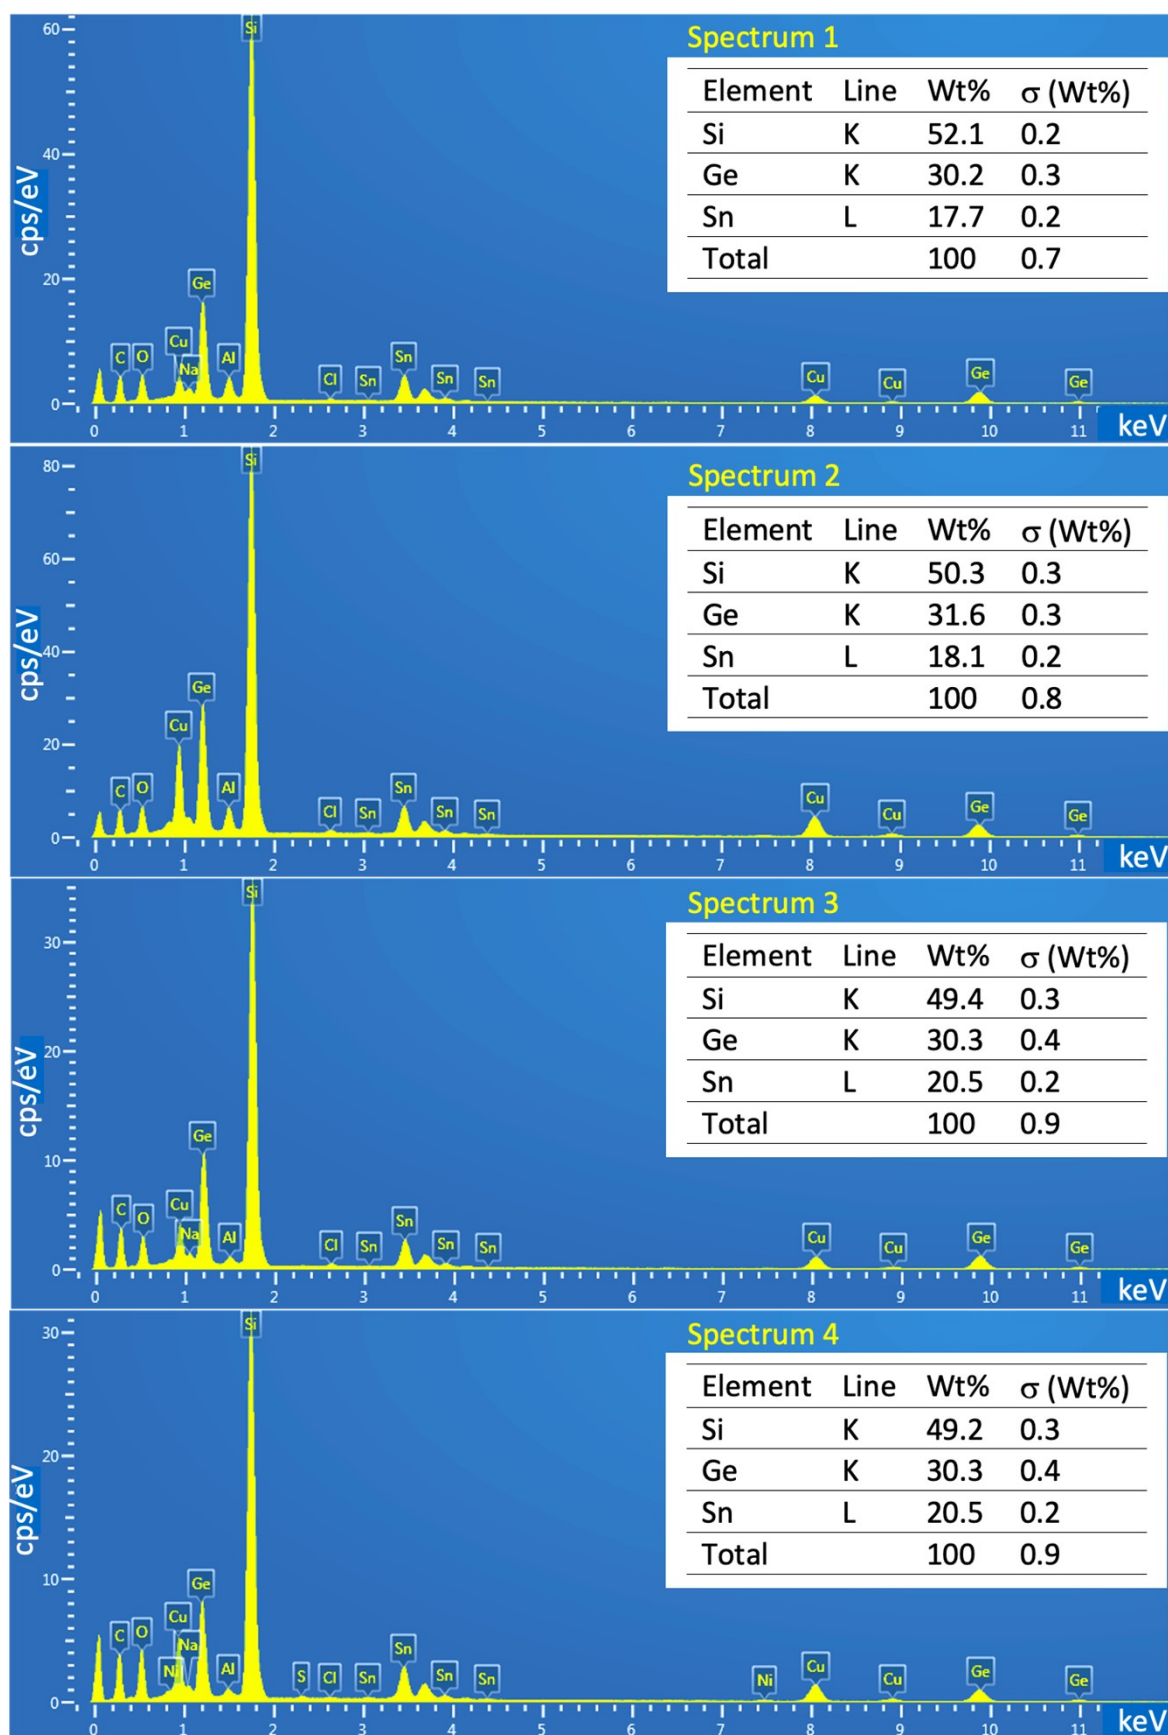

**Figure S1.** Quantitative EDX estimation of the % weight of Si, Ge and Sn from multiple areas of the anode. The mean value was obtained (Sn:Si:Ge weight % ratio is: 18:50:32).

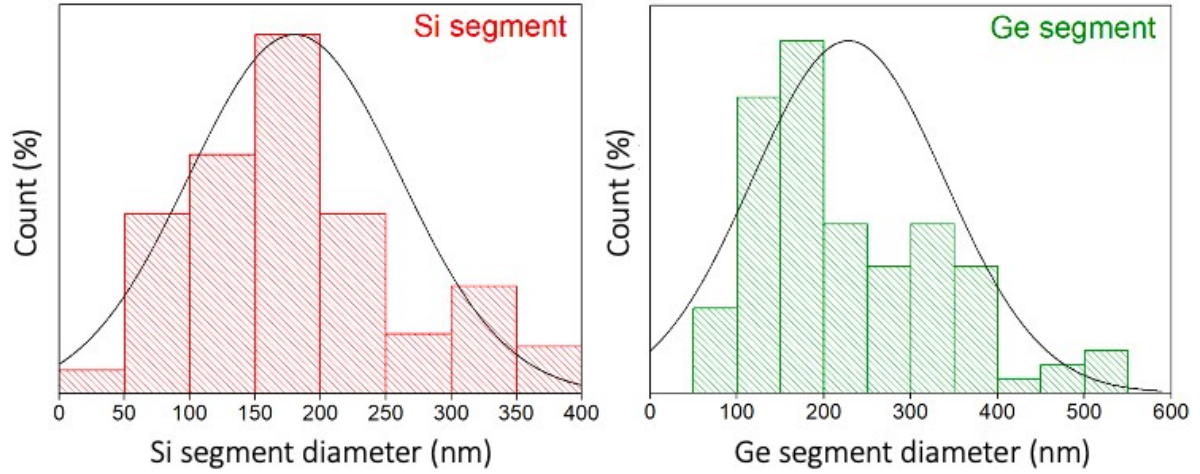

**Figure S2.** Histograms representing NW diameter distribution of Si and Ge segment in hSG NWs. Each distribution was obtained by direct counting method, measuring the diameters for 200 NWs from SEM images.

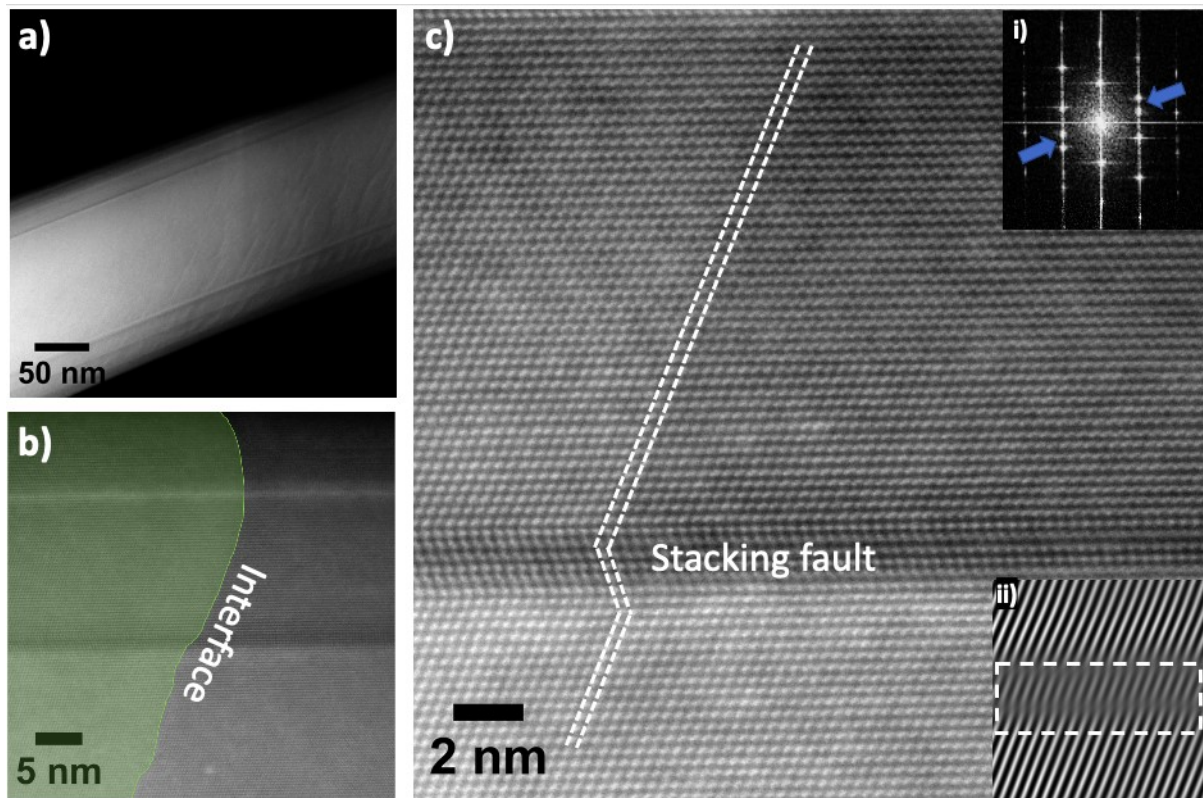

**Figure S3.** (a) HAADF-STEM image of hSG NW viewed from  $\langle 110 \rangle$  orientation. (b) High-resolution image, heterointerface highlighted by the green overlay, showing defect across the Si-Ge segment. (c) Atomic-resolution image of the heterointerface indicating SF marked by the white dashed lines. Insets are (i) FFT spots and (ii) IFFT image corresponding to the regions of SF.

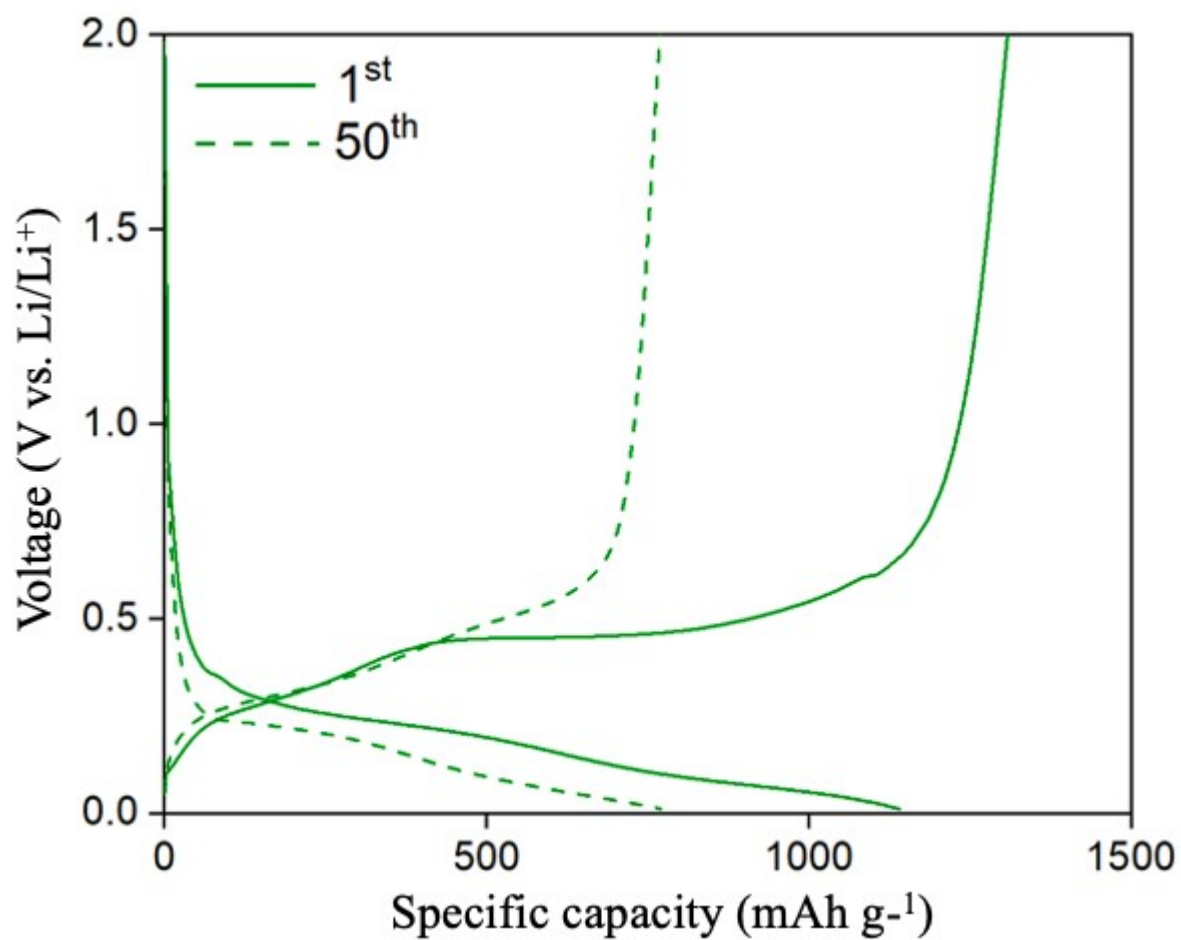

**Figure S4.** Voltage - Specific capacity profile of Si NWs (slurry) for 1<sup>st</sup> and 50<sup>th</sup> cycle at 0.2 C.

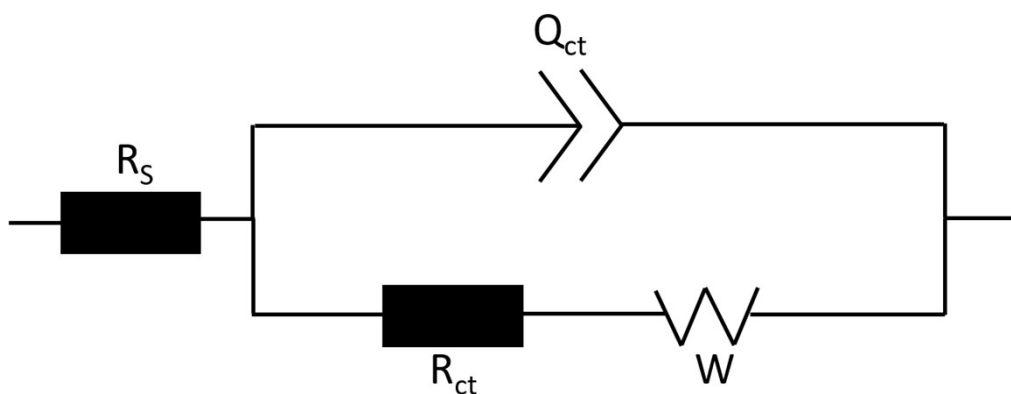

**Figure S5.** Fitting circuit used for EIS analysis.

|                      | $R_s$ (ohm) | $R_{CT}$ (ohm) |
|----------------------|-------------|----------------|
| 1 <sup>st</sup> cyc  | 19.29       | 47.98          |
| 50 <sup>th</sup> cyc | 19.96       | 5.17           |

**Table S1.** Tabulation of  $R_s$  and  $R_{ct}$  values of hSG NWs after 1<sup>st</sup> and 50<sup>th</sup> cycle.

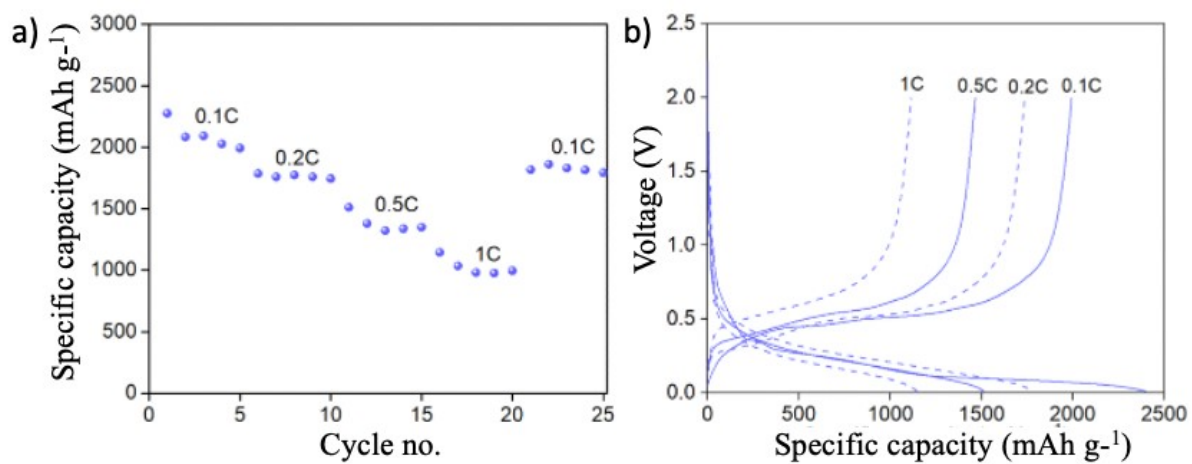

**Figure S6.** (a) Rate capability test and (b) corresponding voltage – specific capacity plot of hSG NWs at various C-rates.

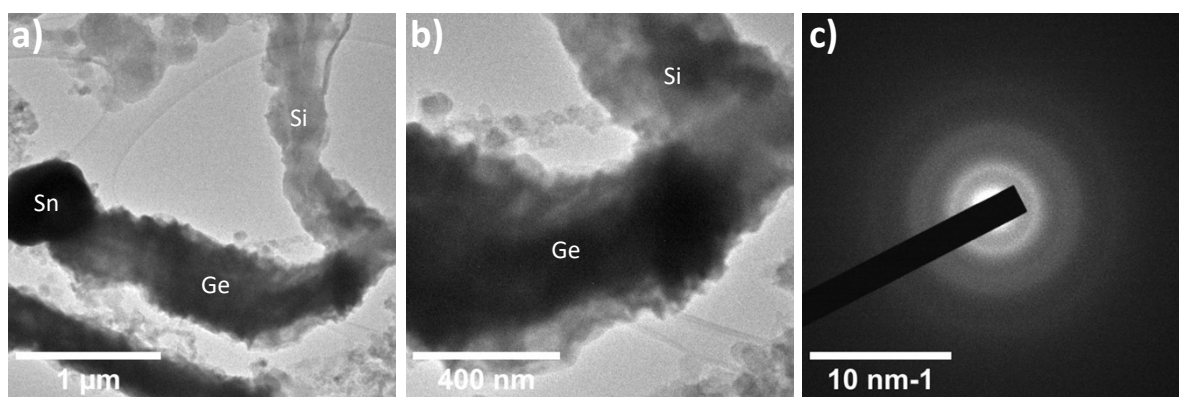

**Figure S7.** TEM analysis of the hSG anode at the 5<sup>th</sup> cycle (a) low magnification TEM image of the Sn, Si and Ge segments. (b) high magnification of Si and Ge segments. (c) Diffraction pattern of b with both segments now amorphous.

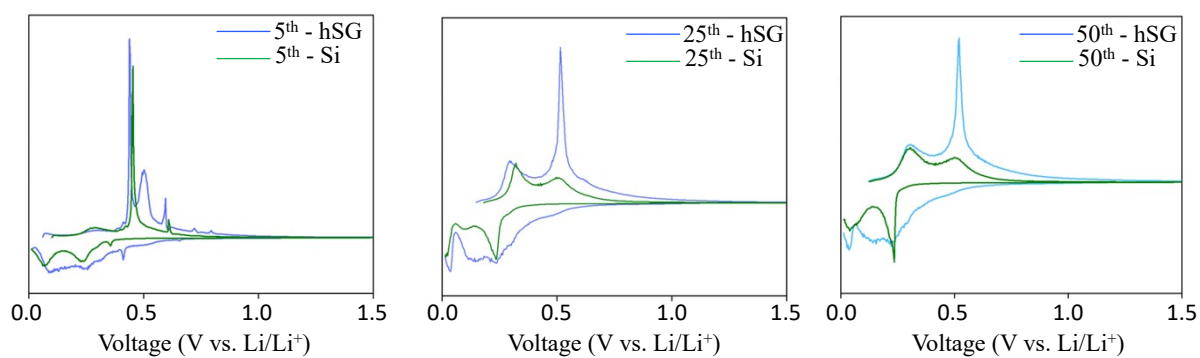

**Figure S8.** Comparison of dQ/dV curve of hSG and Si NWs at 5<sup>th</sup>, 25<sup>th</sup> and 50<sup>th</sup> cycle (at 0.2 C).

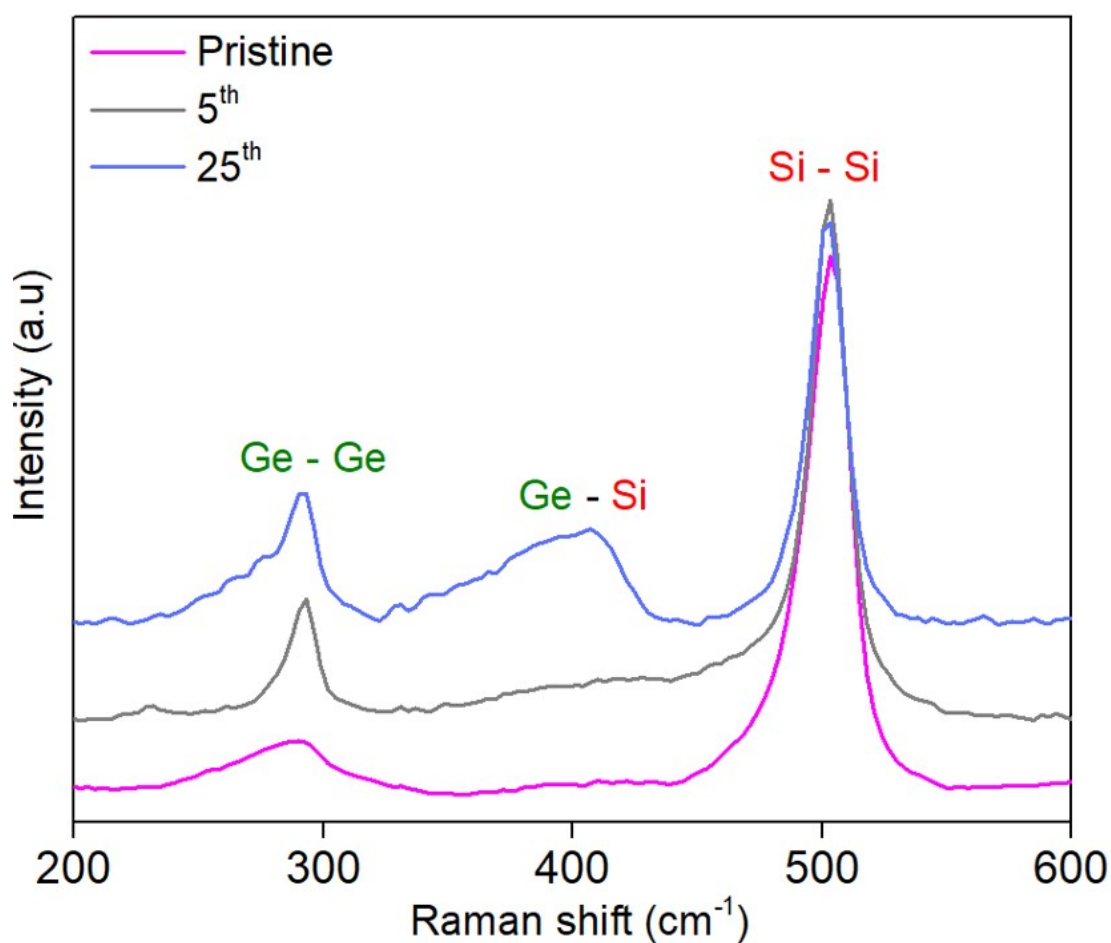

**Figure S9.** Raman spectroscopy analysis of hSG NWs before cycling (pristine), after 5<sup>th</sup> and 25<sup>th</sup> cycle.

| Anode material | Active mass<br>(mg cm <sup>-2</sup> ) | Total anode mass<br>(mg cm <sup>-2</sup> ) | Anode mass<br>reduction (%) |
|----------------|---------------------------------------|--------------------------------------------|-----------------------------|
| Graphite       | 4.56                                  | 5.07                                       | <b>50.7 %</b>               |
| hSG            | 1.5                                   | 2.5                                        |                             |

**Table S2.** Anode mass reduction calculation of hSG vs. standard graphite anode using P/N ratio of 1.18. The total anode mass consists of active material, conductive agent and binder weight as well. For graphite anode total mass calculation, a standard slurry composition of 90 % graphite, 5 % conductive agent and 5 % binder was used. The theoretical capacity of graphite used was 372 mAh g<sup>-1</sup>.

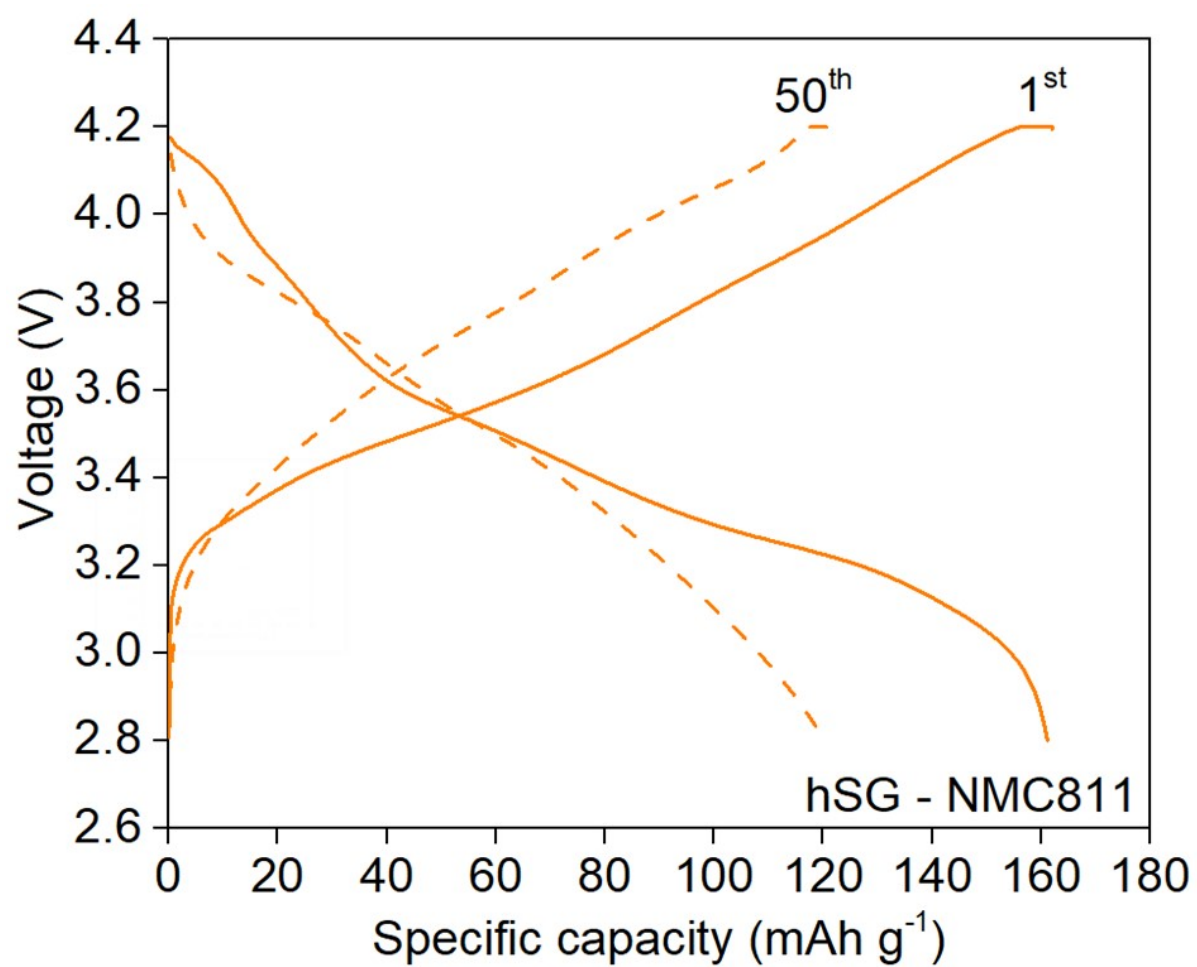

**Figure S10.** Voltage – specific capacity plot of hSG – NMC811 cell after 1<sup>st</sup> and 50<sup>th</sup> cycled at 0.2 C.
